# Supplementary material
Source: PubMed Central journal article supplement (PMC5496774)
Supplement: NIHMS840334-supplement-8.pdf [file NIHMS840334-supplement-8.pdf]

|                                                   | Ligand-free               | cAMP                      |
|---------------------------------------------------|---------------------------|---------------------------|
| <b>Data acquisition</b>                           |                           |                           |
| Microscope                                        | Krios                     | Krios                     |
| Voltage (kV)                                      | 300                       | 300                       |
| Defocus range ( $\mu\text{m}$ )                   | -1.5 to -3.3              | -1.5 to -3.3              |
| Pixel size ( $\text{\AA}$ )                       | 1.3                       | 1.3                       |
| Total electron dose ( $\text{e}^-/\text{\AA}^2$ ) | 50                        | 89                        |
| Exposure time (s)                                 | 10                        | 15                        |
| <b>Reconstruction (RELION)</b>                    |                           |                           |
| Particle number                                   | 55870                     | 125339                    |
| Resolution (unmasked, $\text{\AA}$ )              | 4.17                      | 4.10                      |
| Resolution (masked, $\text{\AA}$ )                | 3.50                      | 3.51                      |
| <b>Refinement (Refmac)</b>                        |                           |                           |
| Resolution limit ( $\text{\AA}$ )                 | 3.50                      | 3.51                      |
| Map sharpening B-factor ( $\text{\AA}^2$ )        | -80                       | -100                      |
| Refinement weight                                 | 0.001                     | 0.0005                    |
| <b>Rms deviations</b>                             |                           |                           |
| Bond length ( $\text{\AA}$ )                      | 0.008                     | 0.007                     |
| Bond angle ( $^\circ$ )                           | 1.207                     | 1.198                     |
| <b>Ramachandran plot</b>                          |                           |                           |
| Favored (%)                                       | 95.38                     | 96.89                     |
| Allowed (%)                                       | 4.62                      | 3.11                      |
| <b>Validation</b>                                 |                           |                           |
| EMRinger score                                    | 2.90                      | 2.73                      |
| MolProbity score                                  | 1.37 (100 <sup>th</sup> ) | 1.16 (100 <sup>th</sup> ) |
| Clashscore                                        | 2.59 (100 <sup>th</sup> ) | 2.04 (100 <sup>th</sup> ) |

**Table S1. Summary of data acquisition parameters and refinement statistics, Related to Figures 1, 6 and 7**
